# Supplementary material for: Modification of sulfonated poly(arylene ether nitrile) proton exchange membranes by poly(ethylene-co-vinyl alcohol)
Source: Royal Society of Chemistry journal article supplement (doi:10.1039/d2ra08294b), 2023-01-01
Supplement: d2ra08294b1.pdf [file d2ra08294b1.pdf]

# Modification of sulfonated poly(arylene ether nitrile) proton exchange membranes by poly(ethylene-co-vinyl alcohol)

Hao Liu<sup>+, a, b</sup>, Tiandu Dong<sup>+, b</sup>, Mingzheng Zhou<sup>+, b</sup>, Zetian Zhang<sup>b</sup>, Yunxi Li<sup>b</sup>, Chuanrui Lu<sup>b</sup>, Yichen Liu<sup>b</sup>, Shengqiu Zhao<sup>a</sup>, Shuhong Zheng<sup>a</sup>, Zihan Meng<sup>a</sup>, Haolin Tang<sup>\*, a</sup>

<sup>a</sup> State Key Laboratory of Advanced Technology for Materials Synthesis and Processing, Wuhan University of Technology, Wuhan 430070, China

<sup>b</sup> State Power Investment Corporation Hydrogen Energy Company, Ltd.Co., Beijing, China

## Dimensional Change

For dimensional change measurements, dry membrane sheets were placed in oven at 80 °C under each relative humidity for 2 h. The dimensional change in membrane thickness direction ( $\Delta t$ ) and the plane direction ( $\Delta l$ ) were calculated from the following Equation:

$$\Delta t = \frac{t - t_s}{t_s} \quad (1)$$

$$\Delta l = \frac{l - l_s}{l_s} \quad (2)$$

where  $t_s$  and  $l_s$  refer to the thickness and length of membranes measured at dry condition, respectively;  $t$  and  $l$  are those of the membrane under each condition.

## Water Stability

For water stability measurements, dry membrane sheets were placed in hot water at 80 °C for 12 h, 24h and 36h, respectively. The residual weight of membranes in hot water was calculated from the following Equation:

$$\Delta m = \frac{m - m_t}{m} \quad (3)$$

Where  $m$  and  $m_t$  refer to the mass of membranes before and after soaking in hot water.

### **Oxidative Stability**

A small piece of membrane sample (1 cm×4 cm) was soaked in Fenton's reagent (3% H<sub>2</sub>O<sub>2</sub> containing 2 ppm FeSO<sub>4</sub>) at 80 °C. The oxidative stability was evaluated 1 h later through the weight of membranes before and after the test.

### **Fuel Cell Performance**

The active surface area of membrane electrolyte assembly (MEA) was 6.25 cm<sup>2</sup>, and the loading amounts of Pt in both gas diffusion electrodes (GDEs) were 0.5 mg cm<sup>-2</sup>. Single-cell test was performed under ambient pressure in an in-house fuel cell station (HTS-125, Shanghai Hephass Energy Co. Ltd), and the cell temperature was set at 80 °C, with varying the gas humidifier temperatures of 50–70 °C to adjust the RH condition. For each testing condition, the cell was equilibrated for at least 2 h before polarization curves were recorded. The gas flow rate (200 mL min<sup>-1</sup> (H<sub>2</sub>), 500 mL min<sup>-1</sup> (air)) was fixed over the entire test.

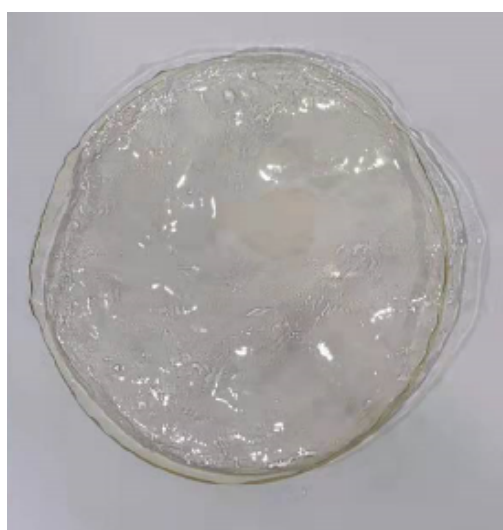

**Pure SPAEN**

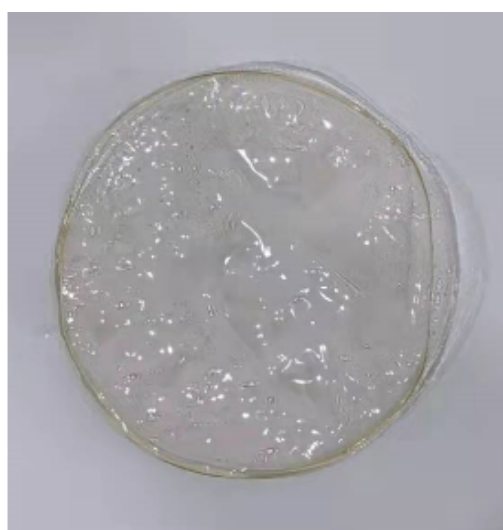

**SPAEN-2%**

Figure S1 The photographs of Pure SPAEN and SPAEN-2%.

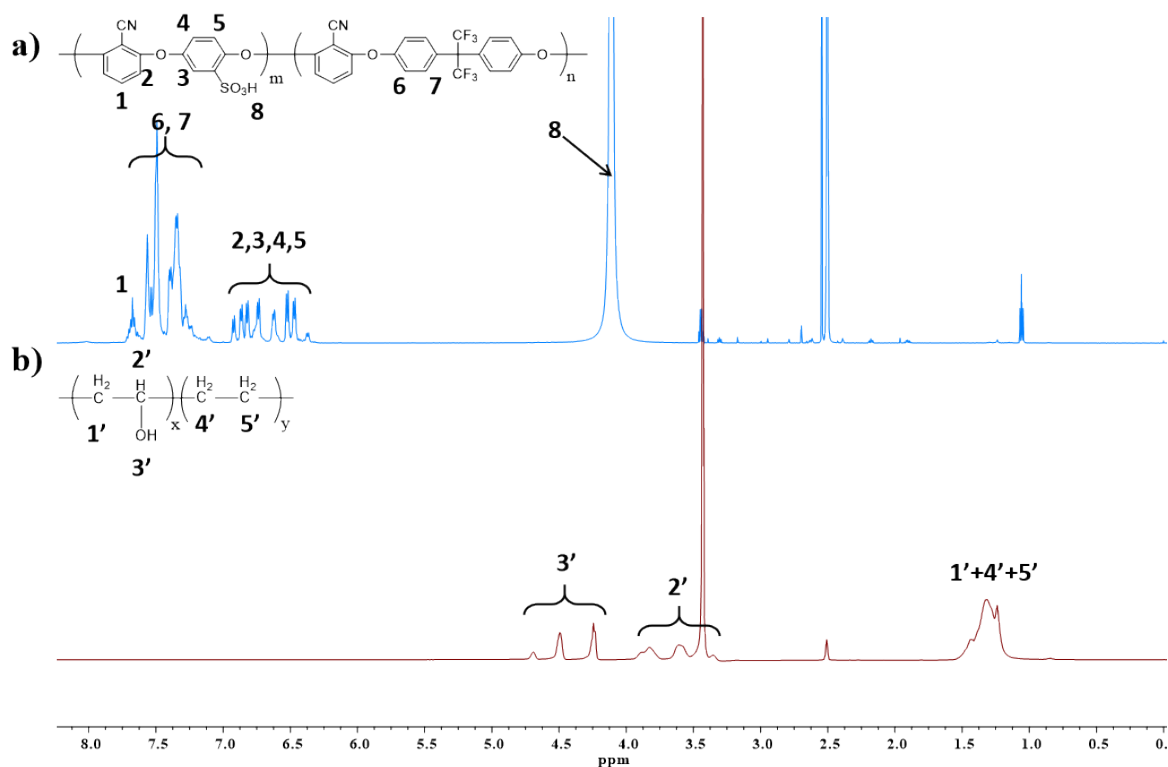

Figure S2  $^1\text{H}$  NMR spectra of a) SPAEN; b) EVOH.

Table S1 Dimensional change of SPAEN-x% membranes

| Code     | Dimensional change <sup>a</sup> |     |        |     |        |     |
|----------|---------------------------------|-----|--------|-----|--------|-----|
|          | %                               |     |        |     |        |     |
|          | 50% RH                          |     | 70% RH |     | 95% RH |     |
|          | TP                              | IP  | TP     | IP  | TP     | IP  |
| SPAEN    | 1.6                             | 1.7 | 3.8    | 3.8 | 6.5    | 6.4 |
| SPAEN-2% | 1.7                             | 1.5 | 4.6    | 4.2 | 7.5    | 7.0 |
| SPAEN-5% | 1.9                             | 2.0 | 5.1    | 4.5 | 8.6    | 8.3 |
| SPAEN-8% | 1.8                             | 1.6 | 4.9    | 4.6 | 8.1    | 7.8 |

<sup>a</sup> dimensional change measured at 80 °C.

Table S2 Water stability of SPAEN-x% membranes

| Code     | RW <sup>a</sup> |      |      |
|----------|-----------------|------|------|
|          | %               |      |      |
|          | 12h             | 24h  | 36h  |
| SPAEN    | 99.8            | 99.7 | 99.5 |
| SPAEN-2% | 99.6            | 99.6 | 99.5 |
| SPAEN-5% | 99.5            | 99.5 | 99.3 |
| SPAEN-8% | 99.7            | 99.6 | 99.6 |

<sup>a</sup> water stability measured at 80 °C in water.

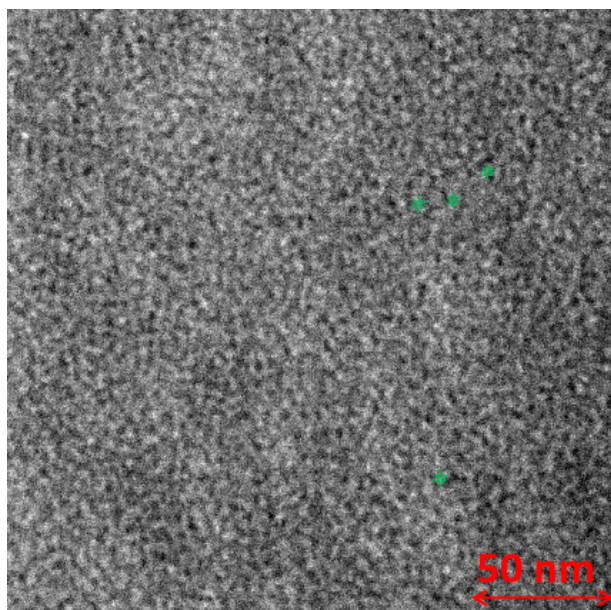

Figure S3 TEM photograph of Pure SPAEN.

Table S3 Oxidation stability of SPAEN-x% membranes

| Code     | RW <sup>a</sup> |             |            |         |
|----------|-----------------|-------------|------------|---------|
|          | %               |             |            |         |
|          | First time      | Second time | Third time | average |
| SPAEN    | 87.3            | 83.1        | 84.9       | 85.1    |
| SPAEN-2% | 89.0            | 91.2        | 88.8       | 89.7    |
| SPAEN-5% | 93.3            | 93.8        | 95.7       | 94.3    |
| SPAEN-8% | 94.5            | 94.0        | 96.4       | 95.0    |

<sup>a</sup> remaining weight. Measured by soaking the membrane sheets (1 cm\*4 cm) in Fenton's reagent (3% H<sub>2</sub>O<sub>2</sub> containing 2 ppm FeSO<sub>4</sub>) at 80 °C for 1 h.
